# Supplementary material for: Ion mobility and material transport on KBr in air as a function of the relative humidity
Source: publisher site journal article supplement (doi:10.3762/bjnano.10.203), 2019-10-30
Supplement: Additional file 1 [file 2190-4286-10-203-S1.pdf]

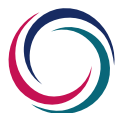

## Supporting Information

for

### **Ion mobility and material transport on KBr in air as a function of the relative humidity**

Dominik J. Kirpal, Korbinian Pürckhauer, Alfred J. Weymouth and Franz J. Giessibl

*Beilstein J. Nanotechnol.* **2019**, *10*, 2084–2093. doi:10.3762/bjnano.10.203

## Additional experimental data

## **Supporting Information**

for

### **Ion mobility and material transport on KBr in air as a function of the relative humidity**

Dominik J. Kirpal<sup>\*1</sup>, Korbinian Pürckhauer<sup>1</sup>, Alfred J. Weymouth<sup>1</sup> and Franz J. Giessibl<sup>1</sup>

Address: <sup>1</sup>Institute of Experimental and Applied Physics, University of Regensburg, 93040 Regensburg, Germany

Email: Dominik J. Kirpal - dominik.kirpal@ur.de

\* Corresponding author

**Additional experimental data**

## Material transport at RH = 28%

Table S1 shows the values corresponding to Figure 7 in the main article. Figure S1 displays the fast scanned image preceding the measurements displayed in Figure 6 in the main article.

**Table S1:** Temporal evolution of the size and change of the defect and accumulation for the experiment at RH = 28.2%. The accumulation decays after about 150 min, the defect after about 170 min. For larger structures the percentage change fluctuates slightly, around 17–25% per scan frame for the defect and around 20–30% for the accumulation. This corresponds to an approximately exponential change.

| frame | time<br>[min] | number of atoms<br>defect | change<br>total | change<br>percentage | number of atoms<br>accumulation | percentage<br>total | change<br>change |
|-------|---------------|---------------------------|-----------------|----------------------|---------------------------------|---------------------|------------------|
| 0     | 4             | 128373                    |                 |                      | 170968                          |                     |                  |
| 1     | 22            | 103330                    | −25043          | −20%                 | 127189                          | −43779              | −26%             |
| 2     | 39            | 78618                     | −24712          | −24%                 | 91442                           | −35747              | −28%             |
| 3     | 57            | 65178                     | −13440          | −17%                 | 73100                           | −18342              | −20%             |
| 4     | 74            | 50977                     | −14201          | −22%                 | 57742                           | −15358              | −21%             |
| 5     | 92            | 40677                     | −10300          | −20%                 | 45937                           | −11805              | −20%             |
| 6     | 109           | 31028                     | −9649           | −24%                 | 32020                           | −13917              | −30%             |
| 7     | 127           | 23253                     | −7775           | −25%                 | 20976                           | −11044              | −34%             |
| 8     | 144           | 11521                     | −11732          | −50%                 | 7142                            | −13834              | −66%             |
| 9     | 162           | 2846                      | −8675           | −75%                 | 0                               | −7142               | −100%            |

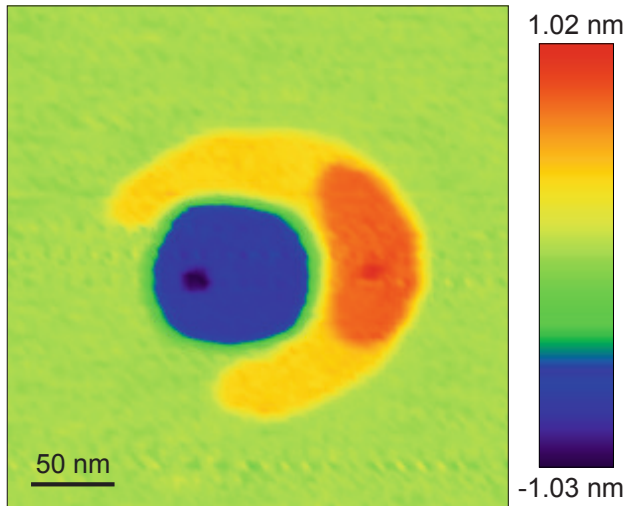

**Figure S1:** Fast scanned first image (256 s) at RH = 28%.

## **Comparison of $RH < 25\%$ and $RH > 25\%$**

Figure S2 and Figure S3 display intermediate steps of the 221 h time evolution at different relative humidities displayed in Figure 2 in the main article. Figure S4 is the full graph corresponding to Figure 3 in the main article.



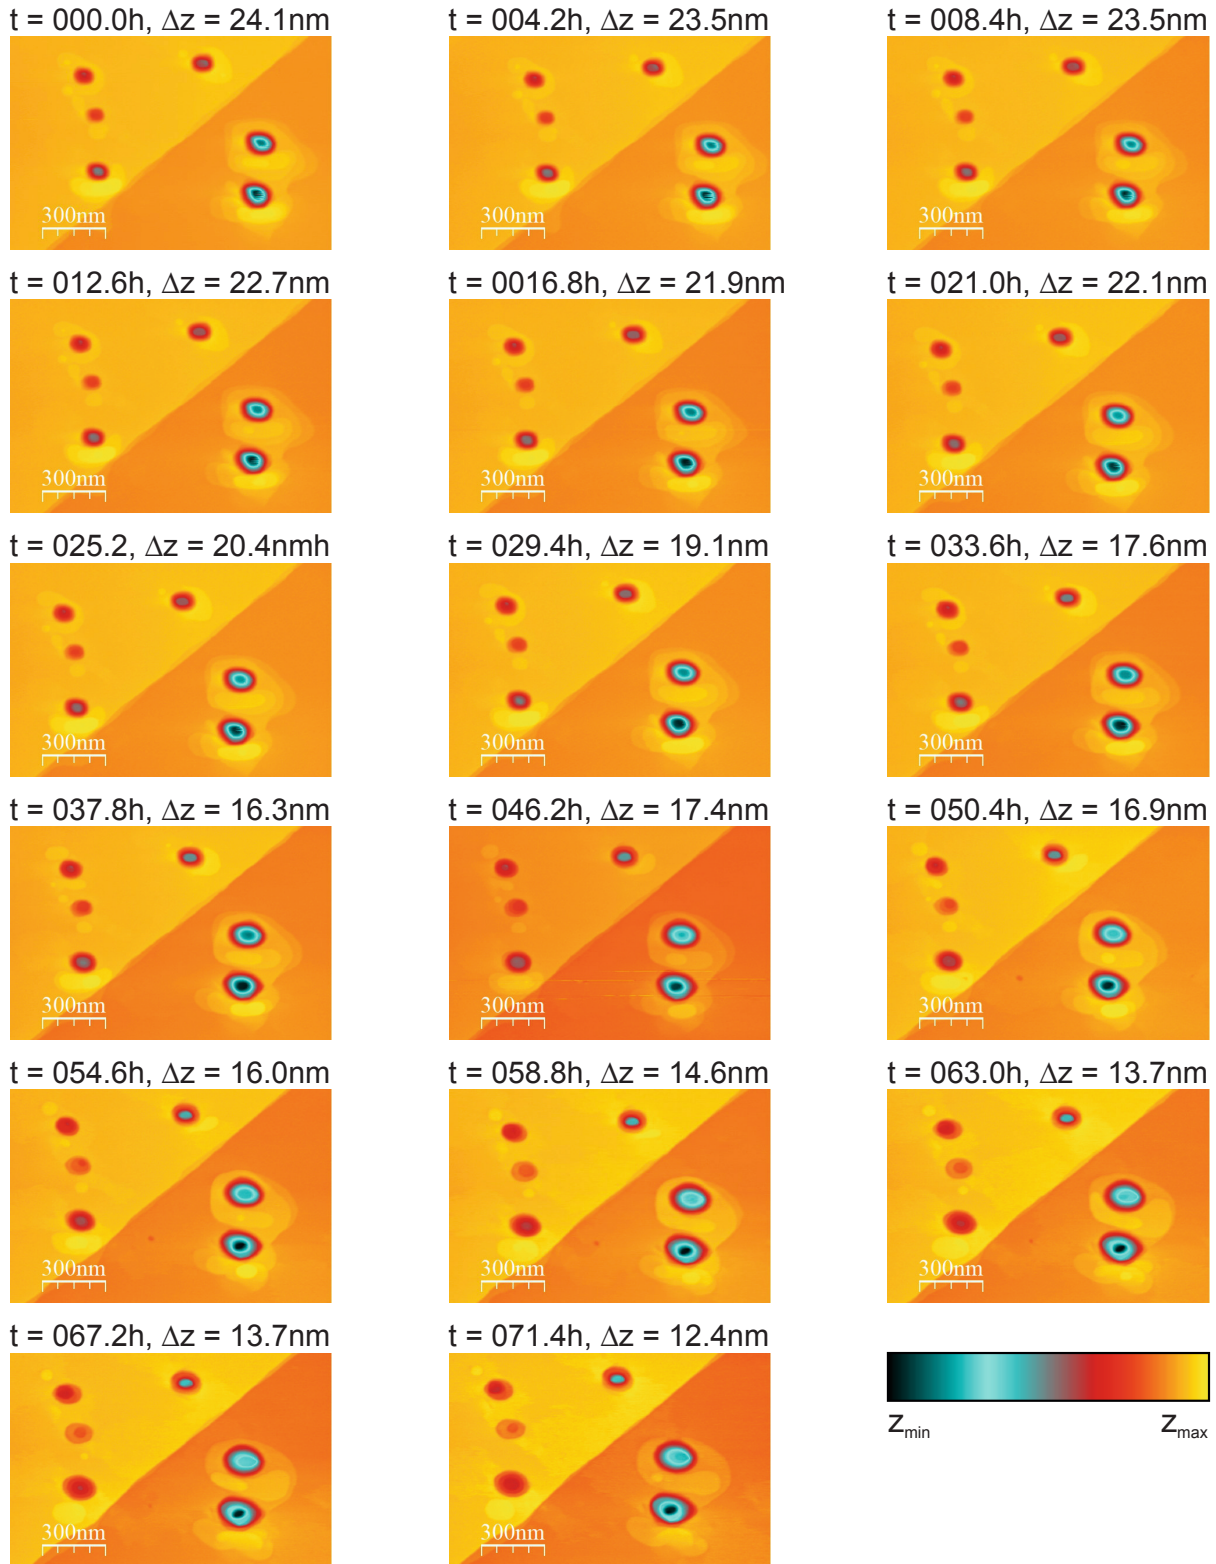

**Figure S2:**  $1.5 \mu\text{m} \times 1.0 \mu\text{m}$ ,  $f_0 = 32893 \text{ Hz}$ ,  $A = 500 \text{ pm}$ ,  $\Delta f = 20 \text{ Hz}$ ,  $t = 0 \text{ h to } 27 \text{ h}$ ,  $20.5\% < \text{RH} < 25.0\%$ ,  $t = 27 \text{ h to } 72 \text{ h}$ ,  $25.0\% < \text{RH} < 35.1\%$ ,  $t > 72 \text{ h}$ ,  $18.5\% < \text{RH} < 23.0\%$  (part 1/2)

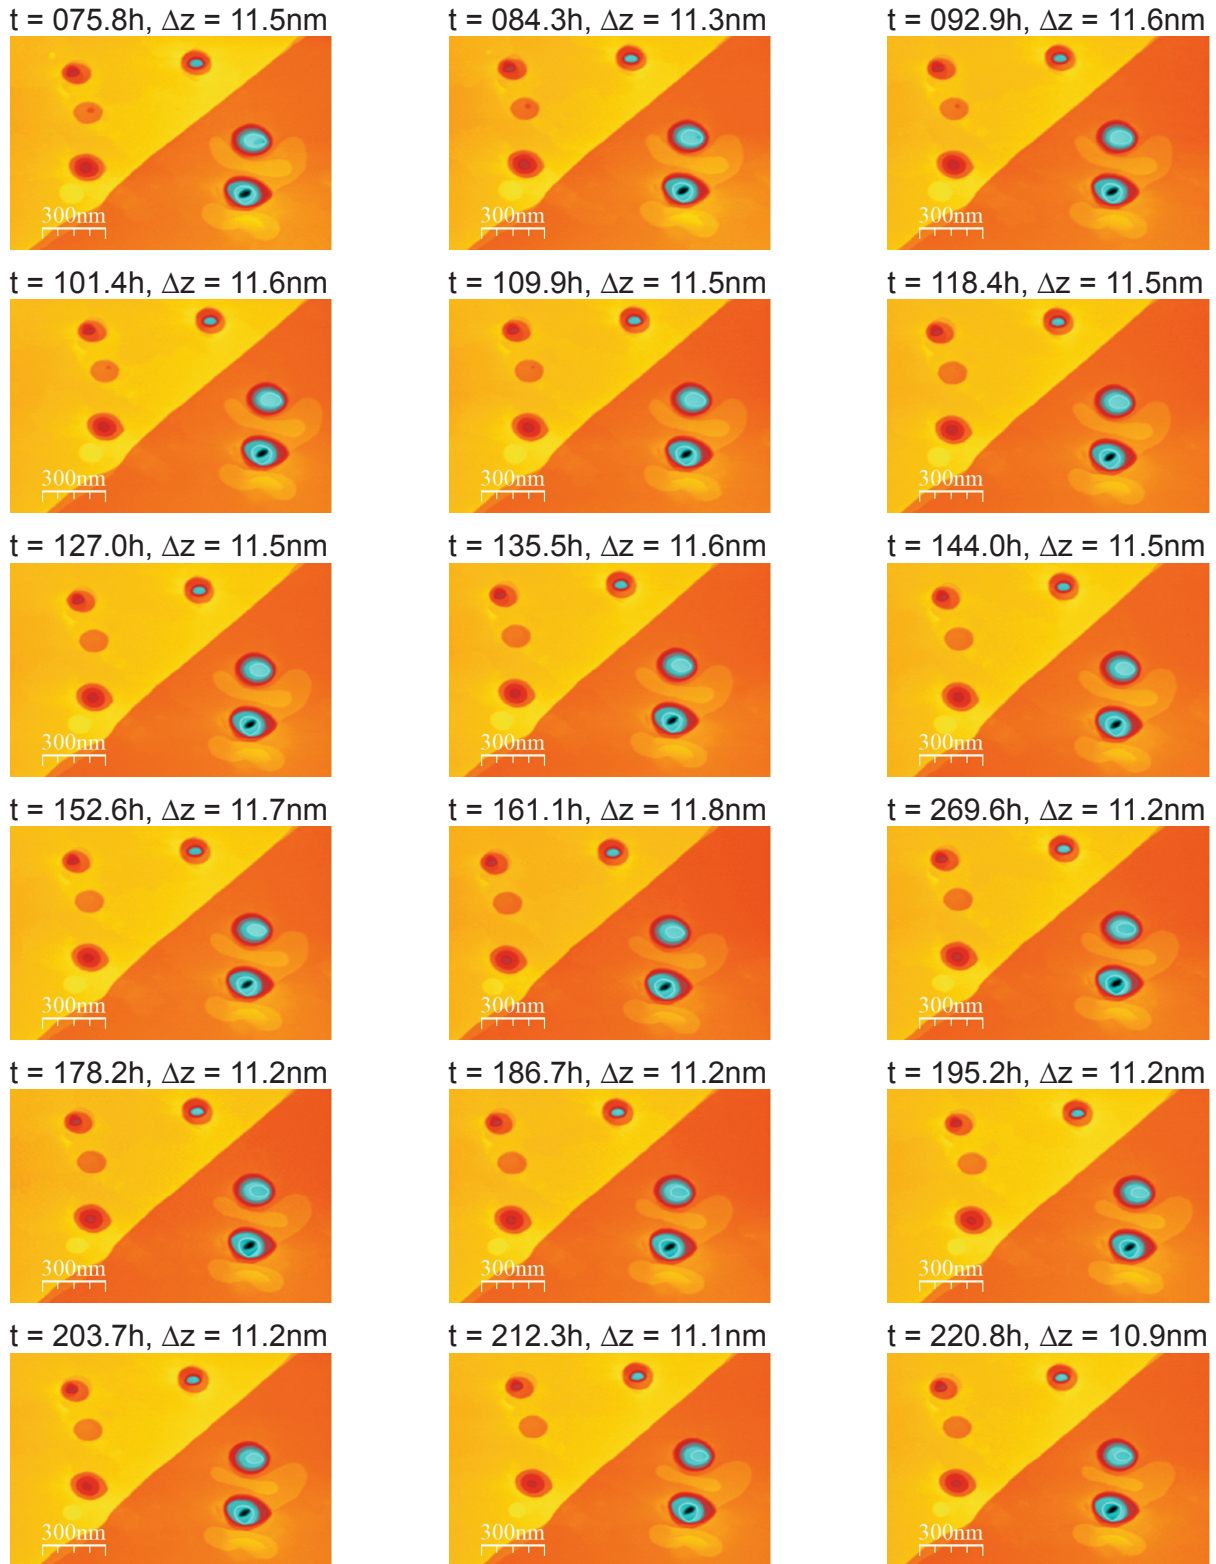

**Figure S3:**  $1.5\ \mu\text{m} \times 1.0\ \mu\text{m}$ ,  $f_0 = 32893\ \text{Hz}$ ,  $A = 500\ \text{pm}$ ,  $\Delta f = 20\ \text{Hz}$ ,  $t = 0\ \text{h}$  to  $27\ \text{h}$ ,  $20.5\% < \text{RH} < 25.0\%$ ,  $t = 27\ \text{h}$  to  $72\ \text{h}$ ,  $25.0\% < \text{RH} < 35.1\%$ ,  $t > 72\ \text{h}$ ,  $18.5\% < \text{RH} < 23.0\%$  (part 2/2)

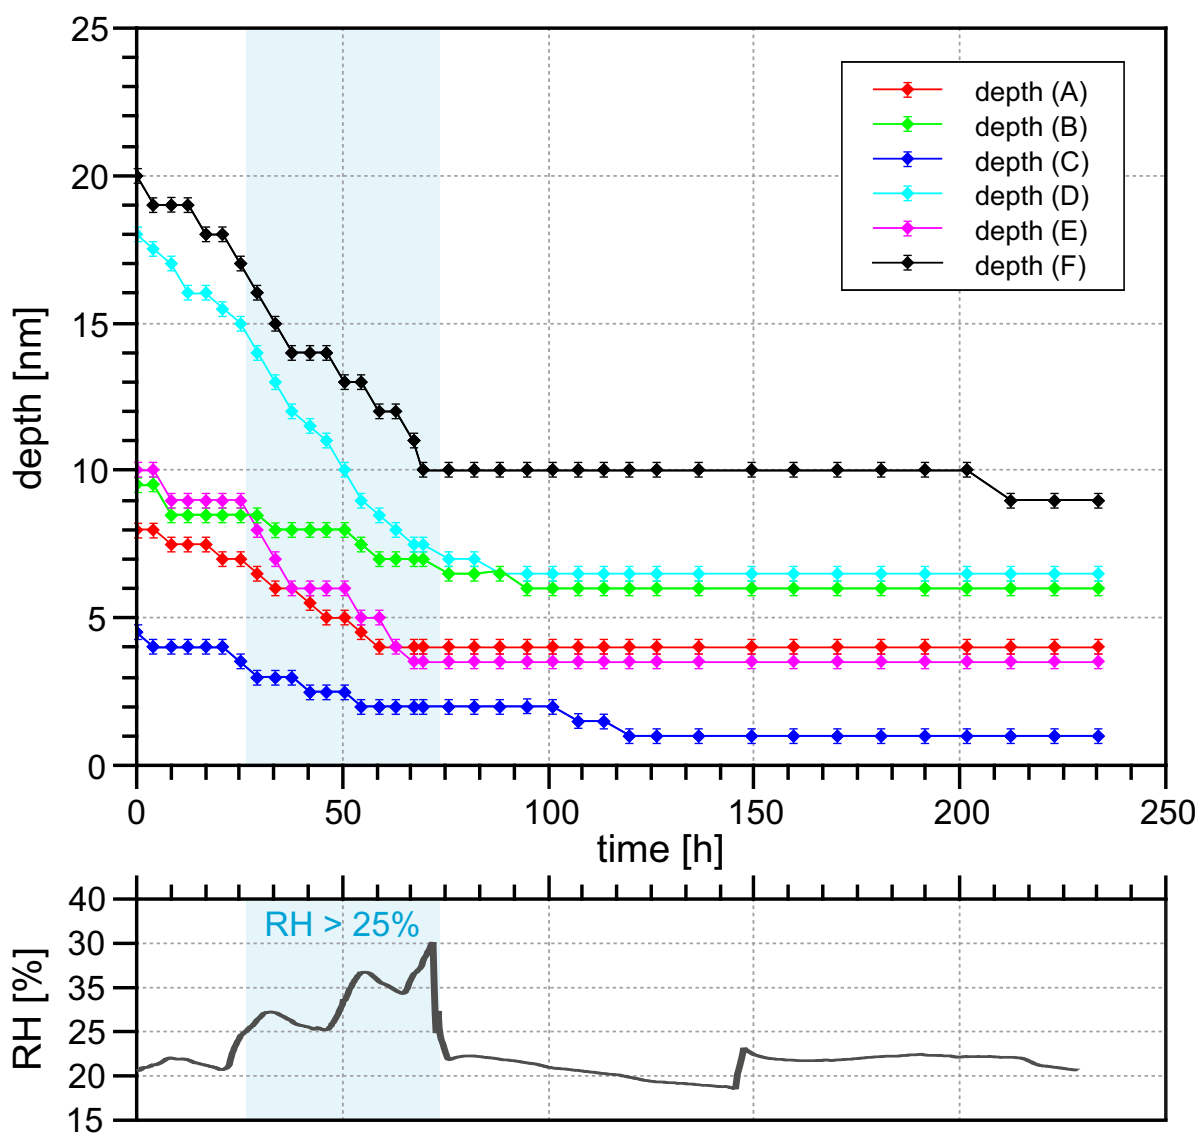

**Figure S4:** Full graph of the maximum depth of the observed holes over time. The features corresponding to each letter A to F are displayed in Figure 2a in the main article. The blue area highlighted in blue shows the second time period with RH > 25%.

## Increase of the diameter of poking holes

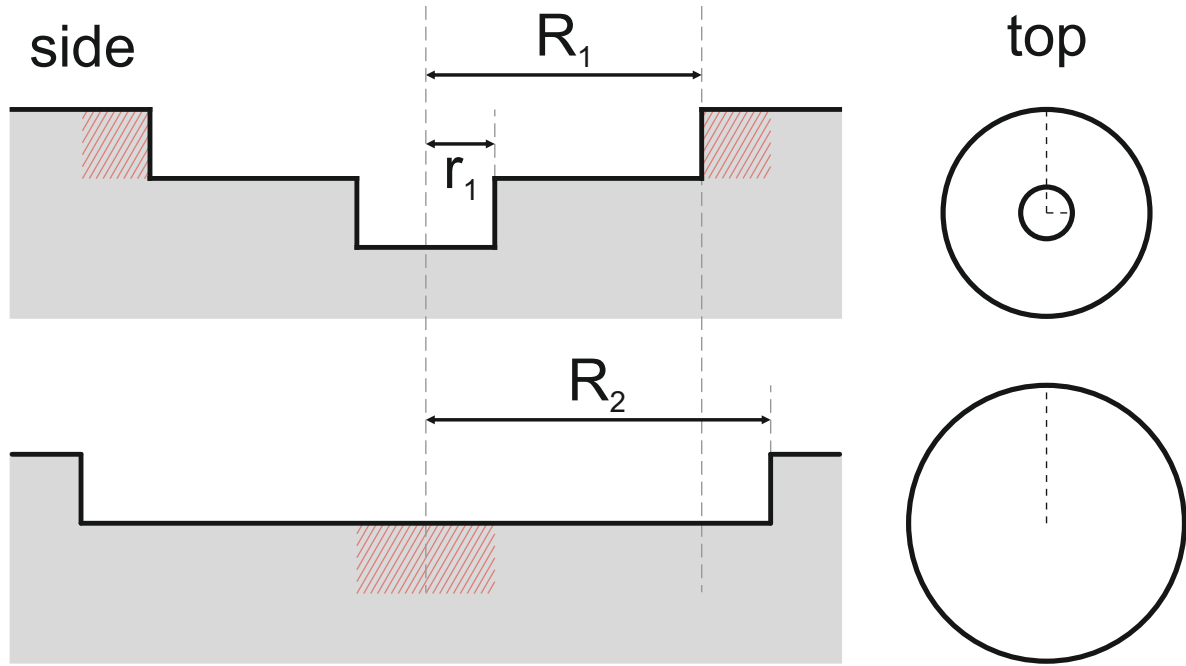

**Figure S5:** Schematic drawing of two defects with same volumes but different shape. The first defect shows two layers, whereas the second only one with an increased radius  $R_2 = \sqrt{r_1 + R_1}$ . For the same volume the edge length of both layers in the first holes is bigger than that of the second hole. The surface energy of the second structure therefore can be considered to be smaller  $E_2 \propto \pi R_2 = \pi \sqrt{R_1 + r_1} < E_1 \propto \pi r_1 + \pi R_1$ .

## Additional data for $14.5\% < RH < 18.5\%$

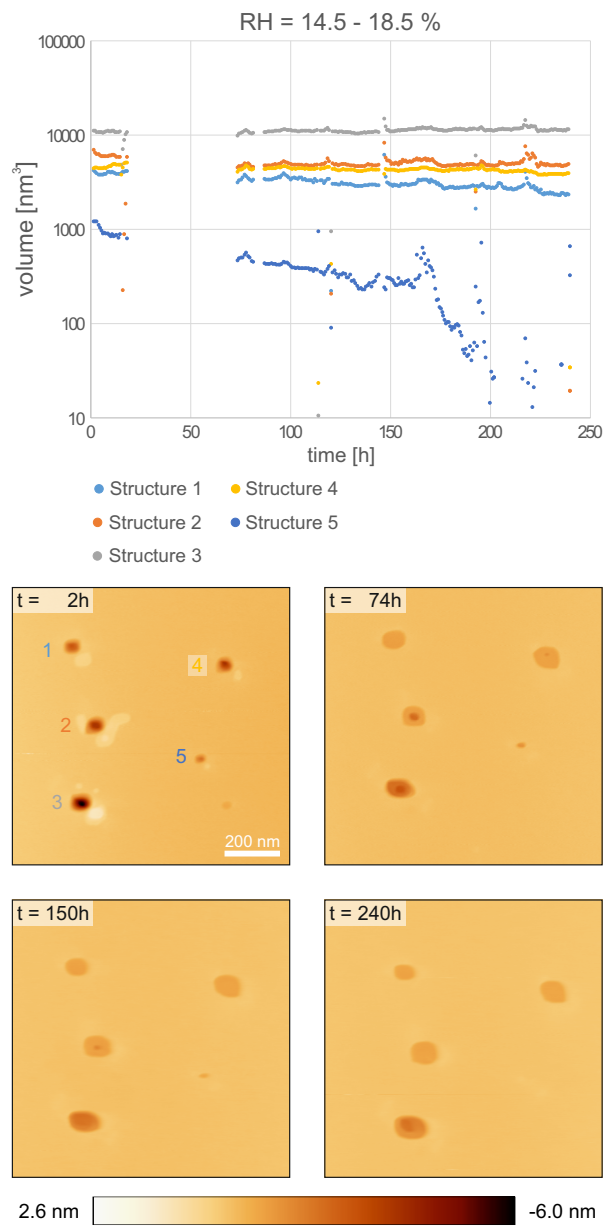

**Figure S6:** Additional data at  $14.5\% < RH < 18.5\%$  and structure sizes comparable to the experiments performed at 12% to 16% and 28.2%. The material transport at this relative humidity is significantly slower, compared to  $RH = 28\%$ , despite having similar volumes.
